# Supplementary material for: Low methodological quality of systematic reviews on acupuncture: a cross-sectional study
Source: BMC Med Res Methodol. 2021 Oct 30;21:237. doi: 10.1186/s12874-021-01437-0 (PMC8557536; doi:10.1186/s12874-021-01437-0)
Supplement: Supplementary file 2 — Additional file 2. [file 12874_2021_1437_MOESM2_ESM.xlsx]

## Sheet: AMSTAR 2 rating
No.	Title AMSTAR-2 item	no=0; yes=1	no=0; partial=1; yes=2	no=0; yes=1	no=0; partial=1; yes=2	no=0; yes=1	no=0; yes=1	no=0; partial=1; yes=2	no=0; partial=1; yes=2	no=0; partial=1; yes=2	no=0; yes=1	no=0; yes=1	no=0; yes=1	no=0; yes=1	no=0; yes=1	no=0; yes=1	no=0; yes=1
		1	2	3	4	5	6	7	8	9	10	11	12	13	14	15	16
1	Acupuncture for primary insomnia: An updated systematic review of randomized controlled trials	1	1	0	1	1	0	0	1	2	0	0	0	0	0	1	1
2	Efficacy and safety of acupuncture for essential hypertension: A meta-analysis	1	1	1	1	1	1	0	2	2	0	0	0	1	1	0	1
3	Acupuncture for the treatment of sudden sensorineural hearing loss: A systematic review and meta-analysis: Acupuncture for SSNHL	1	0	0	1	1	0	0	1	2	0	0	1	1	1	0	1
4	Effectiveness of Acupuncturing at the Sphenopalatine Ganglion Acupoint Alone for Treatment of Allergic Rhinitis: A Systematic Review and Meta-Analysis	1	1	0	1	1	1	0	2	2	0	0	1	1	1	0	1
5	Acupuncture and clomiphene citrate for anovulatory infertility: a systematic review and meta-analysis	1	0	0	1	1	0	0	1	2	0	0	0	1	1	0	1
6	Acupuncture for primary trigeminal neuralgia: A systematic review and PRISMA-compliant meta-analysis	1	0	0	1	1	1	0	0	2	0	0	0	1	1	0	1
7	Acupuncture as an adjunctive treatment for angina due to coronary artery disease: A meta-analysis	1	0	0	2	1	1	0	0	0	0	0	0	1	1	1	1
8	Conventional treatments plus acupuncture for asthma in adults and adolescent: A systematic review and meta-analysis	1	0	0	1	1	1	0	0	2	0	0	0	0	1	0	1
9	Optimizing acupuncture treatment for dry eye syndrome: A systematic review	1	0	0	1	1	1	0	1	2	0	0	0	1	1	0	1
10	Acupuncture using pattern-identification for the treatment of insomnia disorder: a systematic review and meta-analysis of randomized controlled trials	1	0	0	2	1	1	0	1	2	0	0	0	1	1	0	1
11	Efficacy and Safety of Auricular Acupuncture for Cognitive Impairment and Dementia: A Systematic Review	1	2	0	1	1	1	0	1	2	0	0	0	1	1	0	1
12	Acupuncture for cognitive impairment in vascular dementia, alzheimer's disease and mild cognitive impairment: A systematic review and meta-analysis	1	0	0	1	0	1	0	1	2	0	0	1	1	1	0	1
13	Effectiveness of pharmacopuncture for cervical spondylosis: A systematic review and meta-analysis	1	2	0	1	1	1	0	1	2	0	0	0	1	1	0	1
14	Acupuncture combined with swallowing training for poststroke dysphagia: a meta-analysis of randomised controlled trials	1	0	0	1	1	1	0	1	2	0	0	0	0	1	1	1
15	Scalp acupuncture treatment for children's autism spectrum disorders: A systematic review and meta-analysis	1	0	0	1	1	1	0	1	2	0	0	1	1	1	0	1
16	Acupuncture for Post-stroke Shoulder-Hand Syndrome: A systematic review and meta-analysis	1	1	0	1	1	1	0	1	2	0	0	1	1	1	0	1
17	Systematic review of acupuncture for the treatment of alcohol withdrawal syndrome	1	1	0	1	1	1	0	1	2	0	0	1	0	1	0	1
18	Acupuncture for hip osteoarthritis	1	2	1	1	1	1	2	2	2	1	1	1	1	1	1	1
19	Clinical Benefits of Acupuncture for the Reduction of Hormone Therapy-Related Side Effects in Breast Cancer Patients: A Systematic Review	1	0	0	1	1	1	0	1	2	0	0	0	1	1	0	1
20	Combination therapy of scalp electro-acupuncture and medication for the treatment of Parkinson's disease: A systematic review and meta-analysis	1	0	0	1	1	1	0	1	2	0	0	0	0	1	0	1
21	Acupuncture for migraine: A systematic review and meta-analysis	1	0	0	1	1	1	0	1	2	0	0	0	1	1	0	1
22	Acupuncture to Promote Recovery of Disorder of Consciousness after Traumatic Brain Injury: A Systematic Review and Meta-Analysis	1	2	0	1	0	1	0	1	2	0	0	0	1	1	1	1
23	Acupuncture Compared with Intramuscular Injection of Neostigmine for Postpartum Urinary Retention: A Systematic Review and Meta-Analysis of Randomized Controlled Trials	1	0	0	1	0	1	0	1	2	0	0	0	1	1	1	1
24	Acupuncture for the relief of hot flashes in breast cancer patients: A systematic review and meta-analysis of randomized controlled trials and observational studies	1	0	0	1	0	1	0	1	2	0	0	0	0	1	0	1
25	Effectiveness and Safety of Acupuncture for Perimenopausal Depression: A Systematic Review and Meta-Analysis of Randomized Controlled Trials	1	2	0	1	1	0	0	1	2	0	0	0	1	1	1	1
26	Acupuncture plus Chinese Herbal Medicine for Irritable Bowel Syndrome with Diarrhea: A Systematic Review and Meta-Analysis	1	0	0	1	1	1	0	1	2	0	0	0	1	1	1	1
27	Electroacupuncture as an adjunctive therapy for motor dysfunction in acute stroke survivors: A systematic review and meta-analyses	1	1	0	1	1	1	0	1	2	0	1	1	1	1	1	1
28	Acupuncture for Acute Pancreatitis: A Systematic Review and Meta-analysis	1	0	0	1	1	1	0	1	2	0	0	0	1	0	0	1
29	Acupuncture for chronic fatigue syndrome: a systematic review and meta-analysis	1	0	0	1	1	1	0	1	2	0	0	1	1	1	0	1
30	Compare the efficacy of acupuncture with drugs in the treatment of Bell's palsy: A systematic review and meta-analysis of RCTs	1	0	0	1	1	1	0	1	2	0	0	0	1	1	1	1
31	The effectiveness and safety of acupuncture for the treatment of myasthenia gravis: a systematic review and meta-analysis of randomized controlled trials	1	1	0	1	1	1	0	1	2	0	0	0	1	1	0	1
32	Acupuncture therapy for fibromyalgia: A systematic review and meta-analysis of randomized controlled trials	1	1	0	1	1	1	0	2	2	0	0	0	1	1	0	1
33	The effectiveness of acupuncture therapy in patients with post-stroke depression: An updated meta-analysis of randomized controlled trials	1	0	0	1	1	1	0	1	2	0	0	0	1	0	0	1
34	Fire needling for herpes zoster: A systematic review and meta-analysis of randomized clinical trials	1	0	0	1	1	1	0	1	0	0	0	0	0	0	0	1
35	Comparison between the Effects of Acupuncture Relative to Other Controls on Irritable Bowel Syndrome: A Meta-Analysis	1	0	0	1	1	1	0	2	2	0	0	1	1	1	1	1
36	Manual Acupuncture for Optic Atrophy: A Systematic Review and Meta-Analysis	1	0	0	1	1	1	0	1	2	0	0	1	1	1	0	1
37	Effect of warm needling therapy and acupuncture in the treatment of peripheral facial paralysis: A systematic review and meta-analysis	1	0	0	1	1	1	0	1	2	0	0	0	1	0	1	1
38	The Effect of Acupuncture in Breast Cancer-Related Lymphoedema (BCRL): A Systematic Review and Meta-Analysis	1	0	0	1	1	1	0	1	2	0	0	0	1	1	0	1
39	The Efficacy of Acupuncture in Chemotherapy-Induced Peripheral Neuropathy: Systematic Review and Meta-Analysis	1	0	0	1	1	1	0	2	2	0	0	0	0	0	0	1
40	The maintenance effect of acupuncture on breast cancer-related menopause symptoms: a systematic review	1	0	0	1	1	1	0	1	2	0	0	0	0	0	0	1
41	The effectiveness of acupuncture in the management of persistent regional myofascial head and neck pain: A systematic review and meta-analysis	1	1	0	1	1	1	0	1	2	0	0	0	1	1	0	1
42	Acupuncture for the Treatment of Adults with Posttraumatic Stress Disorder: A Systematic Review and Meta-Analysis	1	1	0	1	1	1	0	1	2	0	0	1	0	1	0	1
43	The effectiveness of superficial versus deep dry needling or acupuncture for reducing pain and disability in individuals with spine-related painful conditions: a systematic review with meta-analysis	1	1	0	1	1	1	0	1	2	0	0	0	1	1	0	1
44	Effects of dry needling trigger point therapy in the shoulder region on patients with upper extremity pain and dysfunction: a systematic review with meta-analysis	1	1	0	1	1	1	0	1	1	0	0	0	1	1	0	1
45	Is dry needling effective for low back pain?: A systematic review and PRISMA-compliant meta-analysis	1	0	0	1	1	1	0	1	2	0	0	0	1	1	0	1
46	The effectiveness and safety of acupuncture for patients with atopic eczema: a systematic review and meta-analysis	1	1	0	1	1	1	0	1	2	0	0	0	1	1	0	1
47	Comparing verum and sham acupuncture in fibromyalgia syndrome: a systematic review and meta-analysis	1	1	0	1	1	1	0	1	2	0	0	0	1	1	0	1
48	Acupuncture for symptomatic gastroparesis	1	2	0	1	1	1	2	2	2	1	0	1	1	1	1	1
49	The Efficacy and Safety of Acupuncture for the Treatment of Children with Autism Spectrum Disorder: A Systematic Review and Meta-Analysis	1	1	0	1	1	1	0	1	2	0	0	0	1	1	0	1
50	Acupuncture Versus Sham-acupuncture: A Meta-analysis on Evidence for Non-immediate Effects of Acupuncture in Musculoskeletal Disorders	1	1	0	1	1	1	0	1	2	0	0	0	1	1	0	1
51	Acupuncture Treatment for Post-Stroke Dysphagia: An Update Meta-Analysis of Randomized Controlled Trials	1	0	0	1	1	1	0	1	1	0	0	0	1	1	1	1
52	Effectiveness of Acupuncture Used for the Management of Postpartum Depression: A Systematic Review and Meta-Analysis	1	0	0	1	1	1	0	1	2	0	0	0	1	1	0	1
53	Clinical effects and safety of electroacupuncture for the treatment of post-stroke depression: a systematic review and meta-analysis of randomised controlled trials	1	1	1	1	1	1	0	1	2	0	0	0	0	1	0	1
54	Placebo effect of acupuncture on insomnia: a systematic review and meta-analysis	1	1	0	1	1	1	0	1	2	0	0	0	0	1	1	1
55	Acupuncture for Chronic Pain-Related Insomnia: A Systematic Review and Meta-Analysis	1	0	0	1	1	1	0	1	2	0	0	0	1	1	0	1
56	Evidence for Dry Needling in the Management of Myofascial Trigger Points Associated With Low Back Pain: A Systematic Review and Meta-Analysis	1	0	0	1	1	1	0	2	2	1	0	0	1	1	1	1
57	Warm needle acupuncture in primary osteoporosis management: a systematic review and meta-analysis	1	1	0	1	1	1	1	1	2	0	0	0	1	0	0	1
58	Acupuncture for overactive bladder in adults: a systematic review and meta-analysis	1	0	0	2	1	1	0	0	2	0	0	1	1	1	0	1
59	Traditional acupuncture for menopausal hot flashes: A systematic review and meta-analysis of randomized controlled trials	1	0	0	1	1	1	0	1	2	0	0	0	1	1	0	1
60	The effectiveness of acupuncture for osteoporosis: A systematic review and meta-analysis	1	0	0	1	1	1	0	1	2	0	0	0	0	1	1	0
61	Long-term effects of acupuncture for chronic prostatitis/chronic pelvic pain syndrome: Systematic review and single-Arm meta-Analyses	1	0	0	1	1	1	0	1	2	0	0	0	0	1	0	1
62	Does acupuncture the day of embryo transfer affect the clinical pregnancy rate? Systematic review and meta-analysis	1	0	0	1	1	1	0	0	2	0	0	0	1	1	0	1
63	Acupuncture treatments for infantile colic: a systematic review and individual patient data meta-analysis of blinding test validated randomised controlled trials	1	1	0	1	1	1	0	1	2	0	0	1	0	1	0	1
64	Acupuncture performed around the time of embryo transfer: a systematic review and meta-analysis	1	0	0	1	1	1	0	1	2	0	1	0	0	1	0	1
65	Is Acupuncture Effective for Improving Insulin Resistance? A Systematic Review and Meta-analysis	1	0	0	1	1	1	0	1	2	0	0	0	1	1	0	1
66	Efficacy of acupuncture in the management of post-apoplectic aphasia: A systematic review and meta-analysis of randomized controlled trials	1	0	0	1	1	1	0	1	0	0	0	0	0	0	0	1
67	Acupuncture for lumbar disc herniation: a systematic review and meta-analysis	1	0	0	0	1	1	0	0	2	0	1	0	1	1	0	1
68	Traditional Chinese acupuncture and postpartum depression: A systematic review and meta-analysis	1	0	0	1	1	0	0	1	2	0	0	0	1	1	1	1
69	Acupuncture for Chronic Pain: Update of an Individual Patient Data Meta-Analysis	1	0	0	1	0	0	0	1	0	0	0	0	0	1	0	1
70	Acupuncture Therapy for Functional Effects and Quality of Life in COPD Patients: A Systematic Review and Meta-Analysis	1	1	0	0	1	1	0	2	2	0	0	0	1	1	0	1
71	Electroacupuncture for Reflex Sympathetic Dystrophy after Stroke: A Meta-Analysis	1	0	0	1	1	1	0	0	1	0	0	0	1	1	1	1
72	The Effect of Patient Characteristics on Acupuncture Treatment Outcomes	1	0	0	0	0	0	0	0	0	0	0	0	0	1	0	1
73	The efficacy and safety of acupuncture in women with primary dysmenorrhea: A systematic review and meta-analysis	1	1	0	1	1	1	0	1	0	0	0	0	1	1	0	1
74	Role of acupuncture in the treatment of insulin resistance: A systematic review and meta-analysis	1	0	0	1	1	1	0	1	2	0	0	0	1	1	0	1
75	Appropriateness of sham or placebo acupuncture for randomized controlled trials of acupuncture for nonspecific low back pain: A systematic review and meta-analysis	1	2	0	1	1	1	0	1	2	0	0	0	1	1	0	1
76	Evidence of efficacy of acupuncture in the management of low back pain: a systematic review and meta-analysis of randomised placebo- or sham-controlled trials	1	1	0	1	1	1	0	1	2	0	0	0	0	0	0	1
77	The effects of acupuncture on pregnancy outcomes of in vitro fertilization: A systematic review and meta-analysis	1	0	0	1	1	1	0	1	2	0	0	0	0	1	0	1
78	Acupuncture for migraine without aura: a systematic review and meta-analysis	1	1	0	1	1	1	0	1	2	0	0	0	1	1	0	1
79	Acupuncture for acute stroke	1	2	1	1	1	1	2	2	2	0	0	1	1	1	1	1
80	Acupuncture at Tiaokou (ST38) for Shoulder Adhesive Capsulitis: What Strengths Does It Have? A Systematic Review and Meta-Analysis of Randomized Controlled Trials	1	0	0	1	1	1	0	1	2	0	1	0	1	1	0	1
81	Acupuncture for hypertension	1	2	0	1	1	1	2	2	2	1	0	0	1	1	0	1
82	The effect of acupuncture on Bell's palsy: An overall and cumulative meta-analysis of randomized controlled trials	1	0	0	1	1	1	0	1	2	0	0	0	1	1	0	1
83	Effects of acupuncture on cancer-related fatigue: a meta-analysis	1	0	0	1	0	1	0	1	2	0	0	0	0	1	0	1
84	Acupuncture for adults with overactive bladder	1	1	0	1	1	1	0	1	2	0	0	1	1	1	0	1
85	Electroacupuncture for Postoperative Urinary Retention: A Systematic Review and Meta-Analysis	1	1	0	1	0	1	0	1	2	0	0	0	1	1	1	1
86	Meta-Analysis of Electroacupuncture in Cardiac Anesthesia and Intensive Care	1	0	0	1	0	0	0	0	2	0	0	0	1	0	0	1
87	Acupuncture therapy improves health-related quality of life in patients with chronic obstructive pulmonary disease: A systematic review and meta-analysis	1	0	0	1	0	0	0	1	2	0	0	0	0	0	0	1
88	The effect of acupuncture on the quality of life in patients with migraine: A systematic review and meta-analysis	1	0	0	1	1	1	0	1	2	0	0	0	1	1	1	1
89	Cognitive improvement effects of electro-acupuncture for the treatment of MCI compared with Western medications: A systematic review and Meta-analysis 11 Medical and Health Sciences 1103 Clinical Sciences	1	0	0	1	1	1	0	1	2	0	0	0	1	0	0	1
90	Oriental herbal medicine and moxibustion for polycystic ovary syndrome: A meta-analysis	1	0	0	1	1	1	0	1	2	0	0	0	1	1	0	1
91	The Effect of Acupuncture and Moxibustion on Heart Function in Heart Failure Patients: A Systematic Review and Meta-Analysis	1	1	0	1	1	1	0	1	2	0	0	0	0	0	0	1
92	Acupuncture therapy for the treatment of stable angina pectoris: An updated meta-analysis of randomized controlled trials	1	0	0	1	1	1	0	1	2	0	0	0	1	0	0	1
93	Traditional manual acupuncture combined with rehabilitation therapy for shoulder hand syndrome after stroke within the Chinese healthcare system: a systematic review and meta-analysis	1	0	0	1	1	1	0	1	2	0	0	0	1	1	0	1
94	Effects of moxibustion on pain behaviors in patients with rheumatoid arthritis: A meta-analysis	1	0	0	1	1	1	0	1	2	0	0	0	0	0	0	1
95	Acupuncture Treatment for Chronic Pelvic Pain in Women: A Systematic Review and Meta-Analysis of Randomized Controlled Trials	1	1	0	1	1	1	0	1	2	0	0	0	1	1	0	1
96	The effectiveness of dry needling for patients with orofacial pain associated with temporomandibular dysfunction: a systematic review and meta-analysis	1	1	0	1	1	1	0	1	2	0	0	0	0	0	0	1
97	Acupuncture for postherpetic neuralgia systematic review and meta-analysis	1	1	0	1	0	1	0	1	2	0	0	0	1	1	0	1
98	Acupoint selection for the treatment of dry eye: A systematic review and meta-analysis of randomized controlled trials	1	0	0	1	1	1	0	1	2	0	0	0	0	1	0	1
99	Warm-needle moxibustion for spasticity after stroke: A systematic review of randomized controlled trials	1	0	0	1	1	1	0	1	2	0	0	0	1	1	0	0
100	Acupuncture for menstrual migraine: a systematic review	1	0	0	1	1	1	0	1	2	0	0	1	1	0	0	1
101	The efficacy of acupuncture for stable angina pectoris: A systematic review and meta-analysis	1	1	0	1	1	1	0	1	2	0	1	0	1	0	0	1
102	Acupuncture and weight loss in Asians: A PRISMA-compliant systematic review and meta-analysis	1	0	0	1	0	1	0	0	2	0	0	0	1	0	0	1
103	Effects of Acupuncture on Breast Cancer-Related lymphoedema: A Systematic Review and Meta-Analysis	1	0	0	1	1	1	0	1	2	0	0	0	0	1	0	1
104	Acupuncture for infertile women without undergoing assisted reproductive techniques (ART): A systematic review and meta-analysis	1	0	0	1	1	1	0	1	2	0	0	0	1	0	1	1
105	Moxibustion for alleviating side effects of chemotherapy or radiotherapy in people with cancer	1	2	0	2	1	1	2	2	2	0	0	1	1	1	0	1
106	Acupuncture for stable angina pectoris: A systematic review and meta-analysis	1	1	0	1	1	1	0	1	2	0	0	0	1	0	0	1
